# Supplementary material for: Interventions to modify the habituation of biological responses to repeated stress in healthy adults: a randomized controlled trial
Source: PubMed Central journal article supplement (PMC11577917; doi:10.1186/s13063-024-08620-w), 2024-11-20
Supplement: 13063_2024_8620_MOESM2_ESM.pdf [file 13063_2024_8620_MOESM2_ESM.pdf]

**All items from the World Health Organization Trial Registration Data Set (Version 1.3.1)**

| Data category                                 | Information                                                                                                                                                                                                                                                                                                                                                                                                                                                                                                                                                                                                                                                                                                                                                                                                                                                                                                                                            |
|-----------------------------------------------|--------------------------------------------------------------------------------------------------------------------------------------------------------------------------------------------------------------------------------------------------------------------------------------------------------------------------------------------------------------------------------------------------------------------------------------------------------------------------------------------------------------------------------------------------------------------------------------------------------------------------------------------------------------------------------------------------------------------------------------------------------------------------------------------------------------------------------------------------------------------------------------------------------------------------------------------------------|
| Primary Registry and Trial Identifying Number | German Clinical Trials Register (DRKS) DRKS00034790                                                                                                                                                                                                                                                                                                                                                                                                                                                                                                                                                                                                                                                                                                                                                                                                                                                                                                    |
| Date of Registration in Primary Registry      | August 12, 2024                                                                                                                                                                                                                                                                                                                                                                                                                                                                                                                                                                                                                                                                                                                                                                                                                                                                                                                                        |
| Secondary Identifying Numbers                 | Open Science Framework (OSF) <a href="https://doi.org/10.17605/OSF.IO/XC4F6">https://doi.org/10.17605/OSF.IO/XC4F6</a>                                                                                                                                                                                                                                                                                                                                                                                                                                                                                                                                                                                                                                                                                                                                                                                                                                 |
| Source(s) of Monetary or Material Support     | Deutsche Forschungsgemeinschaft (DFG)<br>Kennedyallee 40<br>53175 Bonn<br>Germany                                                                                                                                                                                                                                                                                                                                                                                                                                                                                                                                                                                                                                                                                                                                                                                                                                                                      |
| Primary Sponsor                               | FAU Erlangen-Nürnberg, Lehrstuhl für Gesundheitspsychologie<br>91052 Erlangen<br>Germany                                                                                                                                                                                                                                                                                                                                                                                                                                                                                                                                                                                                                                                                                                                                                                                                                                                               |
| Secondary Sponsor(s)                          | Not Applicable                                                                                                                                                                                                                                                                                                                                                                                                                                                                                                                                                                                                                                                                                                                                                                                                                                                                                                                                         |
| Contact for Public Queries                    | Johanna Janson-Schmitt, <a href="mailto:johanna.janson-schmitt@fau.de">johanna.janson-schmitt@fau.de</a>                                                                                                                                                                                                                                                                                                                                                                                                                                                                                                                                                                                                                                                                                                                                                                                                                                               |
| Contact for Scientific Queries                | Johanna Janson-Schmitt, <a href="mailto:johanna.janson-schmitt@fau.de">johanna.janson-schmitt@fau.de</a>                                                                                                                                                                                                                                                                                                                                                                                                                                                                                                                                                                                                                                                                                                                                                                                                                                               |
| Public Title                                  | Modification of Biological Stress Response Patterns through Experimental Manipulation of Cognitive Coping Strategies                                                                                                                                                                                                                                                                                                                                                                                                                                                                                                                                                                                                                                                                                                                                                                                                                                   |
| Scientific Title                              | Modification of Biological Stress Response Patterns through Experimental Manipulation of Cognitive Coping Strategies                                                                                                                                                                                                                                                                                                                                                                                                                                                                                                                                                                                                                                                                                                                                                                                                                                   |
| Countries of Recruitment                      | Germany                                                                                                                                                                                                                                                                                                                                                                                                                                                                                                                                                                                                                                                                                                                                                                                                                                                                                                                                                |
| Health Condition(s) or Problem(s) Studied     | Stress response patterns of healthy participants                                                                                                                                                                                                                                                                                                                                                                                                                                                                                                                                                                                                                                                                                                                                                                                                                                                                                                       |
| Intervention(s)                               | <p>Arm 1: Condition 1 will encompass a rumination intervention, in which participants will be instructed to engage in ruminative thinking and write down their thoughts following the initial stress exposure.</p> <p>Arm 2: Condition 2 will encompass a self-compassion intervention, in which participants will be instructed to engage in self-compassion and write down their thoughts following the initial stress exposure.</p> <p>Arm 3: Condition 3 encompasses an active control group, in which participants will be instructed to think neutrally about a specified topic (e.g., description of everyday life), and to write down their thoughts.</p>                                                                                                                                                                                                                                                                                      |
| Key Inclusion and Exclusion Criteria          | <p>Sex: All</p> <p>Minimum Age: 18 Years</p> <p>Maximum Age: no maximum age</p> <p>Inclusion criteria: 1) 18 years or older, 2) living in the greater area of Nuremberg (Germany), 3) female participants: luteal phase of their menstrual cycle, 4) willingness to participate in the study and to provide biological samples</p> <p>Exclusion criteria: 1) younger than 18 years of age, 2) presence of depressive or social anxiety symptomatology, 3) presence of acute and/or chronic somatic diseases, 4) medication intake (e.g., beta blocker, glucocorticoids, anti-depressants), with the exception of hormonal contraceptives in women, 5) Body Mass Index (BMI) below 18 or above 30 kg/m<sup>2</sup>, 6) smoking (&gt; 10 cigarettes/week), 7) receiving psychotherapeutic treatment at study entry, 8) previous experience with the stress protocol, 9) being an employee of Friedrich-Alexander-Universität Erlangen-Nürnberg (FAU)</p> |
| Study Type                                    | Interventional                                                                                                                                                                                                                                                                                                                                                                                                                                                                                                                                                                                                                                                                                                                                                                                                                                                                                                                                         |

|                          |                                                                                                                                                                                                                                                                                                                                                                                                                                                                                                                                                                                                                                                                                                                                                                                                                                                                                                                                                                                                                                                                                                                                                                                                                                                                                                                                                                                                                                                                                                                                   |
|--------------------------|-----------------------------------------------------------------------------------------------------------------------------------------------------------------------------------------------------------------------------------------------------------------------------------------------------------------------------------------------------------------------------------------------------------------------------------------------------------------------------------------------------------------------------------------------------------------------------------------------------------------------------------------------------------------------------------------------------------------------------------------------------------------------------------------------------------------------------------------------------------------------------------------------------------------------------------------------------------------------------------------------------------------------------------------------------------------------------------------------------------------------------------------------------------------------------------------------------------------------------------------------------------------------------------------------------------------------------------------------------------------------------------------------------------------------------------------------------------------------------------------------------------------------------------|
|                          | Allocation: Randomized controlled study                                                                                                                                                                                                                                                                                                                                                                                                                                                                                                                                                                                                                                                                                                                                                                                                                                                                                                                                                                                                                                                                                                                                                                                                                                                                                                                                                                                                                                                                                           |
|                          | Primary purpose: Basic research/physiological study                                                                                                                                                                                                                                                                                                                                                                                                                                                                                                                                                                                                                                                                                                                                                                                                                                                                                                                                                                                                                                                                                                                                                                                                                                                                                                                                                                                                                                                                               |
| Date of First Enrollment | September 01, 2024                                                                                                                                                                                                                                                                                                                                                                                                                                                                                                                                                                                                                                                                                                                                                                                                                                                                                                                                                                                                                                                                                                                                                                                                                                                                                                                                                                                                                                                                                                                |
| Sample Size              | 120                                                                                                                                                                                                                                                                                                                                                                                                                                                                                                                                                                                                                                                                                                                                                                                                                                                                                                                                                                                                                                                                                                                                                                                                                                                                                                                                                                                                                                                                                                                               |
| Recruitment Status       | Recruiting                                                                                                                                                                                                                                                                                                                                                                                                                                                                                                                                                                                                                                                                                                                                                                                                                                                                                                                                                                                                                                                                                                                                                                                                                                                                                                                                                                                                                                                                                                                        |
| Primary Outcome(s)       | <p>Before and after the first and second stress exposures, as well as before and after the intervention, self-reported measures will be assessed: affect (Positive and Negative Affect Schedule, PANAS), task-related stress (Short Stress State Questionnaire, SSSQ), trait and state rumination (Response Style Questionnaire, RSQ; Brief State Rumination Inventory, BSRI), and trait and state self-compassion (Self Compassion Scale, SCS; State Self-Compassion Scale Short Form, SSCS-S).</p> <p>During the first and second stress exposures, biological stress and inflammatory responses will be assessed. To measure stress-induced activation of the HPA axis (cortisol), as well as autonomic (heart rate, heart rate variability, alpha amylase) and inflammatory (plasma IL-6, gene expression rates of pro- and anti-inflammatory cytokines) stress responses, repeated saliva (baseline, -1, +1, +10, +20, +30, +45 minutes relative to TSST) and blood samples (-1, +30, +120 minutes relative to TSST) will be collected, along with continuous heart rate monitoring.</p> <p>To obtain response indices, delta scores will be computed for the initial and repeated exposure to stress using peak values relative to baseline (e.g., peak cortisol values at +1, +10, or +20 minutes post-TSST minus cortisol values at -1 minutes pre-TSST). To obtain habituation indices of biological stress measures, values of the second stress response will be subtracted from the first stress response values.</p> |
| Key Secondary Outcomes   | Secondary outcomes will be psychological (e.g., emotion regulation, coping), demographic (e.g., age, gender, sex), and anthropometric (e.g., BMI) variables. Associations between primary and secondary outcomes will be analyzed in an exploratory fashion.                                                                                                                                                                                                                                                                                                                                                                                                                                                                                                                                                                                                                                                                                                                                                                                                                                                                                                                                                                                                                                                                                                                                                                                                                                                                      |
| Ethics Review            | <p>Ethik-Kommission der Friedrich-Alexander-Universität Erlangen-Nürnberg<br/> Krankenhausstr. 12<br/> 91054 Erlangen<br/> Germany<br/> +40-9131-8522270<br/> <a href="mailto:ethikkommission@fau.de">ethikkommission@fau.de</a><br/> <a href="http://www.ethikkommission.fau.de">http://www.ethikkommission.fau.de</a></p> <p>Date of ethics committee application: January 19, 2021<br/> Ethics committee number: 10_21 B</p> <p>Vote of the Ethics Committee: Approved<br/> Date of the vote: February 09, 2021</p>                                                                                                                                                                                                                                                                                                                                                                                                                                                                                                                                                                                                                                                                                                                                                                                                                                                                                                                                                                                                            |
| Completion date          | September 30, 2026                                                                                                                                                                                                                                                                                                                                                                                                                                                                                                                                                                                                                                                                                                                                                                                                                                                                                                                                                                                                                                                                                                                                                                                                                                                                                                                                                                                                                                                                                                                |
| Summary Results          | Not Applicable                                                                                                                                                                                                                                                                                                                                                                                                                                                                                                                                                                                                                                                                                                                                                                                                                                                                                                                                                                                                                                                                                                                                                                                                                                                                                                                                                                                                                                                                                                                    |
| IPD sharing statement    |                                                                                                                                                                                                                                                                                                                                                                                                                                                                                                                                                                                                                                                                                                                                                                                                                                                                                                                                                                                                                                                                                                                                                                                                                                                                                                                                                                                                                                                                                                                                   |
